# Supplementary material for: Reconstruction and Validation of a Genome-Scale Metabolic Model of Streptococcus oralis (iCJ415), a Human Commensal and Opportunistic Pathogen
Source: Front Genet. 2020 Mar 3;11:116. doi: 10.3389/fgene.2020.00116 (PMC7063969; doi:10.3389/fgene.2020.00116)
Supplement: Table S1 — Biomass calculations. [file Table_1.xlsx]

## Sheet: BOFdat
Table S1: Biomass calculations
Data input and results for Biomass constituents found by BOFdat
DNA
Part of total Biomass composition: 2.11%
Data input to BOFdat: S. Oralis SK141 genome (NCBI accesion no: NZ_JPGA00000000)
Metabolite
datp_c	-0.014609078615068867
dttp_c	-0.015043390273484707
dctp_c	-0.011066463976821005
dgtp_c	-0.009716896765853496
ppi_c	0.0504358206170091
RNA
Data input to BOFdat: Genbank genome annotation (Accesion no. CP027540) and PMID 30165663 (Used data from C+Y media)
Part of total Biomass composition: 9.9%
atp_c	-0.09155382156480044
gtp_c	-0.06601509834521019
utp_c	-0.08815799538146
ctp_c	-0.06354229810948397
ppi_c	0.3092692134009546
Protein/amino acids
Data input to BOFdat: PMID 21699404
Part of total Biomass composition: 33.2%
his__L_c	-0.0438232925306245
thr__L_c	-0.19239814908897668
asp__L_c	-0.18192368671166845
phe__L_c	-0.0814346979307605
tyr__L_c	-0.06624167175939905
lys__L_c	-0.17974668290544546
trp__L_c	-0.013930899632052931
asn__L_c	-0.1305654919614321
gly_c	-0.438036300822583
ala__L_c	-0.4375425466687082
pro__L_c	-0.12332995523132832
met__L_c	-0.05997893507297081
ile__L_c	-0.05997893507297081
leu__L_c	-0.2332378420346543
val__L_c	-0.2332378420346543
ser__L_c	-0.20042680956314615
arg__L_c	-0.20042680956314615
glu__L_c	-0.21765406244871668
gln__L_c	-0.08844969819749555
cys__L_c	-0.01346325844860891
h2o_c	3.2472263296135906
Lipids
Data input to BOFdat: Lipid composition is collected from PMID 15982422.
Part of total Biomass composition: 7%
clpn_sor_c	-0.00023058442242721464
pg_sor_c	-0.0001919709296107192
galglc_dag_c	-0.00024864172438760244
glc_dag_c	-0.000040122311703221705
Coenzymes and inorganic ions
Part of total Biomass composition: 5%
fe2_c	-0.08953
fe3_c	-0.08953
glyc3p_c	-0.02672887365102175
h_c	-4.96
k_c	-0.1278
mg2_c	-0.2057
mn2_c	-0.09101
na1_c	-0.19771639931389248
nh4_c	-0.2771
ca2_c	-0.1247

## Sheet: Manually
Biomass constituents found manually
	ID	Formula	Molecular_weight	Fraction of Biomass (g/g biomass)	Coefficient
Growth associated energy requirements(a)
	atp_c				-63
	h2o_c				-63
	adp_c				-63
	pi_c				63
	h_c				63
Peptidoglycan (16.1%*)	PG_c	C39H64N8019	948.968	0.161	0.169658
Lipoteichoic acid (4.5%*)	lipo_ta_c	C12694H23090N500O3800P500	259025	0.045	0.000173728
Teichoic acid (15.3%*)	taunit_c	C92H164N5O33P5	2023.17	0.153	0.0756239
Additional coenzymes (b) (6.8%*)
NAD	nad_c	C21H26N7O14P2	662.417	0.00618182	0.00933222
NADP	nadp_c	C21H25N7O17P3	740.381	0.00618182	0.00834951
S-adenosyl-methionine	amet_c	C15H23N6O5S	399.445	0.00618182	0.015476
FAD	fad_c	C27H31N9O15P2	783.534	0.00618182	0.00788967
pyridoxal 5-phosphate	pydx5p_c	C8H8NO6P	245.126	0.00618182	0.025219
Coenzyme A	coa_c	C21H32N7O16P3S	763.502	0.00618182	0.00809666
Tetrahydrofolate	thf_c	C19H21N7O6	443.413	0.00618182	0.0139414
5-Methyltetrahydrofolate	5mthf	C20H24N7O6	458.448	0.00618182	0.0134842
10-Formyltetrahydrofolate	10fthf	C20H21N7O7	471.423	0.00618182	0.0131131
thiamine diphosphate	thmpp_c	C12H16N4O7P2S	422.291	0.00618182	0.0146388
FMN	fmn_c	C17H19N4O9P	454.328	0.00618182	0.0136065
(a) from PMID ﻿31293525.
(b) from PMID ﻿27939572
*Part of total Biomass
