# Supplementary material for: Reconstruction and Validation of a Genome-Scale Metabolic Model of Streptococcus oralis (iCJ415), a Human Commensal and Opportunistic Pathogen
Source: Front Genet. 2020 Mar 3;11:116. doi: 10.3389/fgene.2020.00116 (PMC7063969; doi:10.3389/fgene.2020.00116)
Supplement: Table S2 — in-silico media contents. [file Table_2.xlsx]

## Sheet: aa_auxotrophies
Table S2: in-silico media contents
Media content when testing amino acid auxotrophies (Exchange reactions open)
EX_fe2_e
EX_h2o_e
EX_pi_e
EX_k_e
EX_mg2_e
EX_mn2_e
EX_gln__L_e
EX_arg__L_e
EX_cys__L_e
EX_gly_e
EX_his__L_e
EX_ile__L_e
EX_leu__L_e
EX_lys__L_e
EX_met__L_e
EX_val__L_e
EX_btn_e
EX_ncam_e
EX_pnto__R_e
EX_ribflv_e
EX_thm_e
EX_glc__D_e
EX_ade_e
EX_gua_e
EX_ura_e
EX_ca2_e
EX_na1_e
EX_ac_e
EX_chol_e
EX_h_e
EX_co2_e

## Sheet: carbon_sources
Media content when testing Carbon sources (Exchange reactions open)
EX_ac_e
EX_cys__L_e
EX_na1_e
EX_pi_e
EX_k_e
EX_ade_e
EX_ura_e
EX_gua_e
EX_fe2_e
EX_mn2_e
EX_mg2_e
EX_ncam_e
EX_pnto__R_e
EX_ribflv_e
EX_thm_e
EX_btn_e
EX_h2o_e
EX_h_e
EX_co2_e
EX_gln__L_e
EX_arg__L_e
EX_gly_e
EX_his__L_e
EX_ile__L_e
EX_leu__L_e
EX_lys__L_e
EX_met__L_e
EX_val__L_e
EX_chol_e

## Sheet: growth_validation
Media content and lower_bounds for exchange reactions when testing growth rate and by product production. Adapted from PMID ﻿31293525.
Exchange_reaction	Lower_bound
EX_ade_e	-4.56
EX_arg__L_e	-0.46
EX_btn_e	-6.30
EX_chol_e	-1000.0
EX_cys__L_e	-2.03
EX_fe2_e	-1000
EX_gln__L_e	-1.64
EX_gly_e	-1.48
EX_gua_e	-4.08
EX_h2o_e	-1000
EX_his__L_e	-0.60
EX_ile__L_e	-0.99
EX_k_e	-18.86
EX_leu__L_e	-2.16
EX_lys__L_e	-1.85
EX_met__L_e	-0.54
EX_mg2_e	-1000.0
EX_mn2_e	-1000.0
EX_na1_e	-1000.0
EX_pi_e	-18.86
EX_pnto__R_e	-2.81
EX_ribflv_e	-1.64
EX_thm_e	-2.32
EX_ura_e	-5.50
EX_val__L_e	-1.74
EX_ala__L_e	-1.66
EX_asn__L_e	-1.63
EX_asp__L_e	-1.85
EX_fol_e	-1.40
EX_glu__L_e	-2.09
EX_nac_e	-5.00
EX_phe__L_e	-1.04
EX_pro__L_e	-3.64
EX_pyr_e	-0.70
EX_ser__L_e	-1.99
EX_so4_e	-0.31
EX_thr__L_e	-1.14
EX_trp__L_e	-0.15
EX_tyr__L_e	-0.08
EX_xan_e	-0.67
